# Supplementary material for: Is brain perfusion correlated to switching mood states and cognitive impairment in bipolar disorder type I? A longitudinal study using perfusion imaging approach
Source: PubMed Central journal article supplement (PMC10582948; doi:10.3389/fpsyt.2023.1244134), 2023-10-04
Supplement: Table_1.pdf [file Table_1.pdf]

**Supplementary material 1. List of patients' pharmacological treatments at follow-up**

|                   | <b>Treatment</b>                                                                                   |
|-------------------|----------------------------------------------------------------------------------------------------|
| <b>Subject 1</b>  | Quetiapine 100mg/ day<br>Magnesium Valproate 800mg/day                                             |
| <b>Subject 2</b>  | Haloperidol 7.5mg/day<br>Biperiden 2mg/day<br>Sodium valproate 1000mg/day                          |
| <b>Subject 4</b>  | Quetiapine 225mg/day<br>Magnesium Valproate 800mg /day                                             |
| <b>Subject 5</b>  | Magnesium Valproate 800mg/day<br>Lamotrigine 100mg/day                                             |
| <b>Subject 7</b>  | Magnesium Valproate 1250mg/day<br>Quetiapine 25mg/day<br>Paroxetine 15mg/day<br>Clonazepam 1mg/day |
| <b>Subject 8</b>  | Magnesium Valproate 800mg/day<br>Risperidone 1mg/day                                               |
| <b>Subject 9</b>  | Quetiapine 300mg/day<br>Lamotrigine 150mg/day<br>Clonazepam 0.5mg/day                              |
| <b>Subject 10</b> | Lithium carbonate 900mg/day<br>Olanzapine 10mg/day                                                 |
